# Supplementary material
Source: Research Square preprint supplement (doi:10.21203/rs.3.rs-9995789/v1)
Supplement: Supplementary file 1 [file 87fe47c962a289b303cde717.pdf]

Supporting Information for Multimodal wearable  
sensing reveals personalized digital signatures of  
momentary happiness and stress

**Table 1** Participant-specific Pearson correlation summaries for pre-15 min CGM and affect.

| Analysis                         | Happiness Median $r$ | Stress Median $r$ |
|----------------------------------|----------------------|-------------------|
| Raw CGM vs. actual affect        | -0.03                | 0.04              |
| $\Delta$ CGM vs. actual affect   | -0.04                | 0.07              |
| Raw CGM vs. $\Delta$ affect      | -0.03                | 0.07              |
| $\Delta$ CGM vs. $\Delta$ affect | -0.04                | 0.07              |

**Table 2** EMA model-family summary for participant-specific held-out performance. Median RMSE, MAE, held-out  $R^2$ , and  $\Delta$ RMSE are summarized across eligible participant-specific analyses. Positive  $\Delta$ RMSE indicates lower held-out error than the participant-specific time-bin baseline.

| Outcome   | Model         | Feature set | Participants | Median RMSE | Median MAE | Median R2 | Median $\Delta$ RMSE | Improved (%) |
|-----------|---------------|-------------|--------------|-------------|------------|-----------|----------------------|--------------|
| happiness | Linear ridge  | Pre         | 38           | 15.509      | 11.902     | -0.247    | -0.574               | 23.684       |
| happiness | Spline ridge  | Pre         | 37           | 14.283      | 11.275     | -0.174    | -0.286               | 29.730       |
| happiness | Elastic net   | Pre         | 37           | 14.463      | 11.992     | -0.149    | -0.304               | 24.324       |
| happiness | Linear ridge  | Post        | 38           | 14.093      | 11.494     | -0.143    | -0.127               | 39.474       |
| happiness | Spline ridge  | Post        | 37           | 14.827      | 11.163     | -0.150    | -0.428               | 32.432       |
| happiness | Elastic net   | Post        | 37           | 14.093      | 10.916     | -0.116    | -0.051               | 35.135       |
| happiness | Linear ridge  | Pre+post    | 38           | 14.508      | 11.036     | -0.161    | -0.175               | 36.842       |
| happiness | Spline ridge  | Pre+post    | 37           | 14.772      | 11.498     | -0.140    | -0.158               | 35.135       |
| happiness | Elastic net   | Pre+post    | 37           | 14.276      | 10.869     | -0.123    | -0.114               | 24.324       |
| happiness | Linear ridge  | Pre+context | 38           | 16.401      | 12.529     | -0.336    | -0.992               | 18.421       |
| happiness | Spline ridge  | Pre+context | 37           | 15.284      | 11.868     | -0.282    | -0.946               | 16.216       |
| happiness | Elastic net   | Pre+context | 37           | 15.984      | 11.930     | -0.199    | -0.321               | 27.027       |
| happiness | Random forest | Pre+context | 37           | 13.609      | 10.692     | -0.126    | -0.149               | 43.243       |
| happiness | SVR-RBF       | Pre+context | 37           | 14.213      | 10.768     | -0.125    | -0.066               | 45.946       |
| stress    | Linear ridge  | Pre         | 38           | 18.808      | 13.785     | -0.173    | -0.334               | 23.684       |
| stress    | Spline ridge  | Pre         | 37           | 18.432      | 14.209     | -0.184    | -0.443               | 29.730       |
| stress    | Elastic net   | Pre         | 37           | 18.307      | 13.938     | -0.151    | -0.152               | 10.811       |
| stress    | Linear ridge  | Post        | 38           | 18.296      | 12.918     | -0.159    | -0.326               | 23.684       |
| stress    | Spline ridge  | Post        | 37           | 17.645      | 13.766     | -0.150    | -0.238               | 37.838       |
| stress    | Elastic net   | Post        | 37           | 17.437      | 12.960     | -0.117    | -0.098               | 24.324       |
| stress    | Linear ridge  | Pre+post    | 38           | 18.103      | 14.162     | -0.150    | -0.261               | 18.421       |
| stress    | Spline ridge  | Pre+post    | 37           | 18.838      | 14.158     | -0.184    | -0.329               | 27.027       |
| stress    | Elastic net   | Pre+post    | 37           | 18.392      | 13.917     | -0.142    | -0.156               | 10.811       |
| stress    | Linear ridge  | Pre+context | 38           | 19.319      | 14.451     | -0.243    | -0.464               | 26.316       |
| stress    | Spline ridge  | Pre+context | 37           | 19.978      | 14.721     | -0.222    | -0.732               | 24.324       |
| stress    | Elastic net   | Pre+context | 37           | 18.106      | 14.069     | -0.159    | -0.162               | 18.919       |
| stress    | Random forest | Pre+context | 37           | 17.681      | 13.277     | -0.136    | -0.149               | 40.541       |
| stress    | SVR-RBF       | Pre+context | 37           | 17.269      | 12.782     | -0.136    | -0.038               | 43.243       |

**Table 3** SHAP feature-class frequency for EMA random-forest models using pre+context features. Percentages indicate the fraction of top-10 SHAP-ranked feature-class appearances assigned to each physiological or behavioral class. These summaries describe model feature usage and are not interpreted as causal feature effects.

| dataset | outcome   | feature_class | top10_count | total | top10_percent |
|---------|-----------|---------------|-------------|-------|---------------|
| ema     | happiness | Activity      | 55          | 370   | 14.865        |
| ema     | happiness | CGM           | 146         | 370   | 39.459        |
| ema     | happiness | HR/autonomic  | 143         | 370   | 38.649        |
| ema     | happiness | Sleep         | 26          | 370   | 7.027         |
| ema     | stress    | Activity      | 72          | 370   | 19.459        |
| ema     | stress    | CGM           | 138         | 370   | 37.297        |
| ema     | stress    | HR/autonomic  | 129         | 370   | 34.865        |
| ema     | stress    | Sleep         | 31          | 370   | 8.378         |

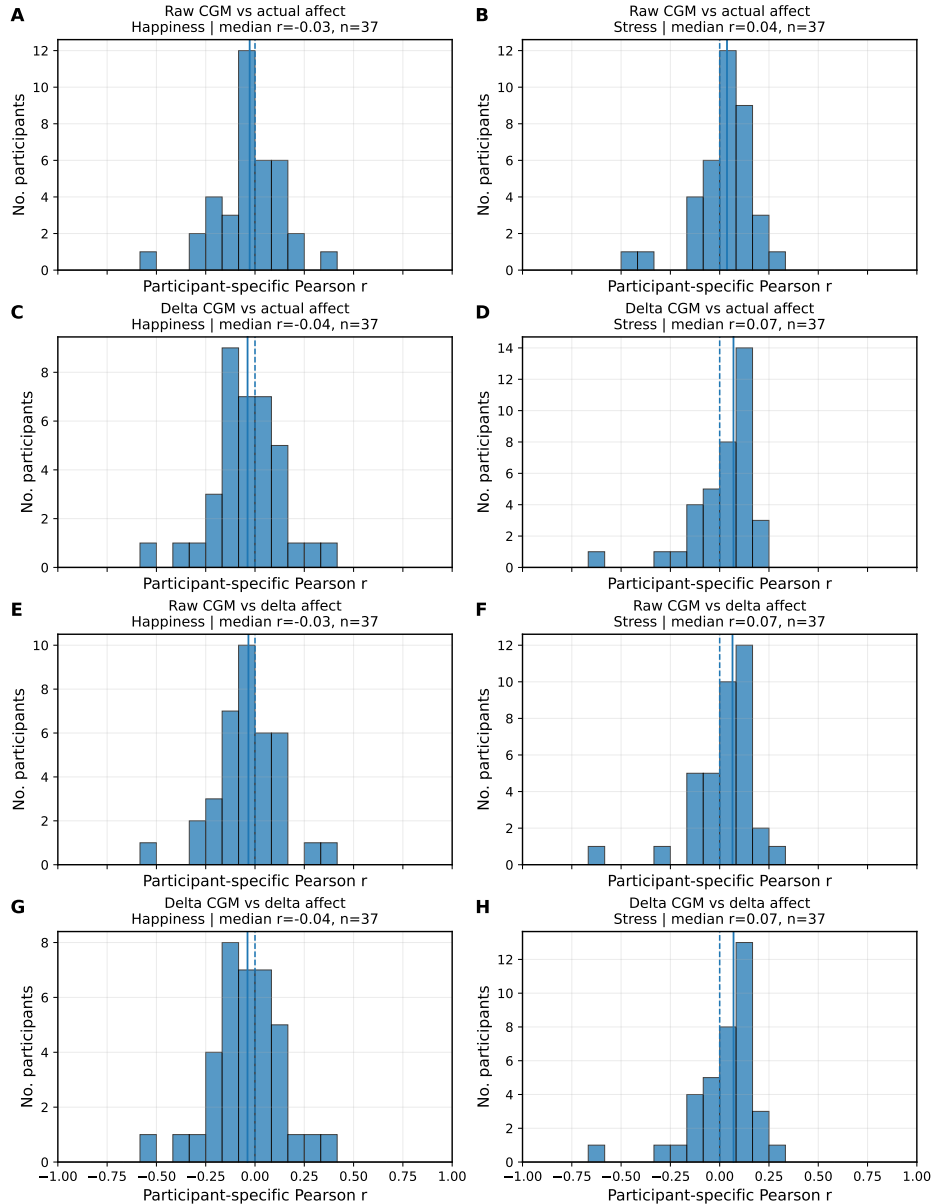

**Fig. 1 Participant-specific Pearson correlations between pre-15 min CGM and affect under alternative baseline-adjustment schemes.** Histograms show the distribution of participant-specific Pearson correlation coefficients computed using four formulations: raw CGM versus raw affect (A,B), participant-centered ( $\Delta$ ) CGM versus raw affect (C,D), raw CGM versus participant-centered affect (E,F), and participant-centered CGM versus participant-centered affect (G,H). Happiness correlations remained centered near zero across all formulations, whereas stress correlations showed a small positive shift. Median correlation coefficients are indicated in each panel. These analyses demonstrate that baseline adjustment of either CGM or affect variables does not materially alter the observed association structure.

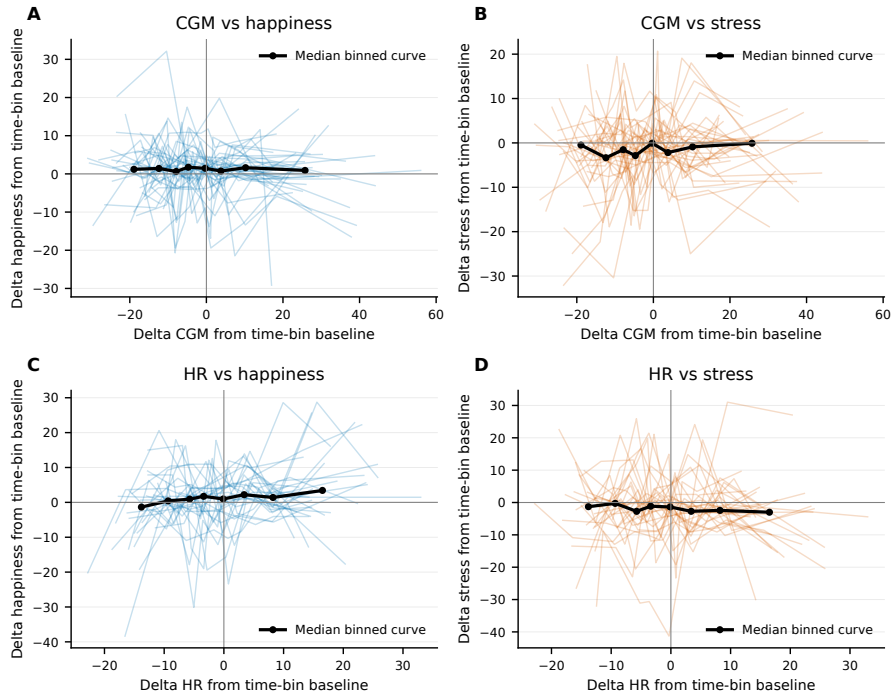

**Fig. 2** Within-person binned association curves for CGM, HR, happiness, and stress. **A**, Within-person deviations in CGM from time-bin baseline versus deviations in happiness from time-bin baseline. **B**, Within-person deviations in CGM versus deviations in stress. **C**, Within-person deviations in HR versus deviations in happiness. **D**, Within-person deviations in HR versus deviations in stress. Thin lines show participant-specific binned curves, and black lines show the median binned curve across participants. The absence of a strong monotonic or threshold-like median curve indicates that weak linear sensor–affect associations were not explained by an obvious missed nonlinear relationship.

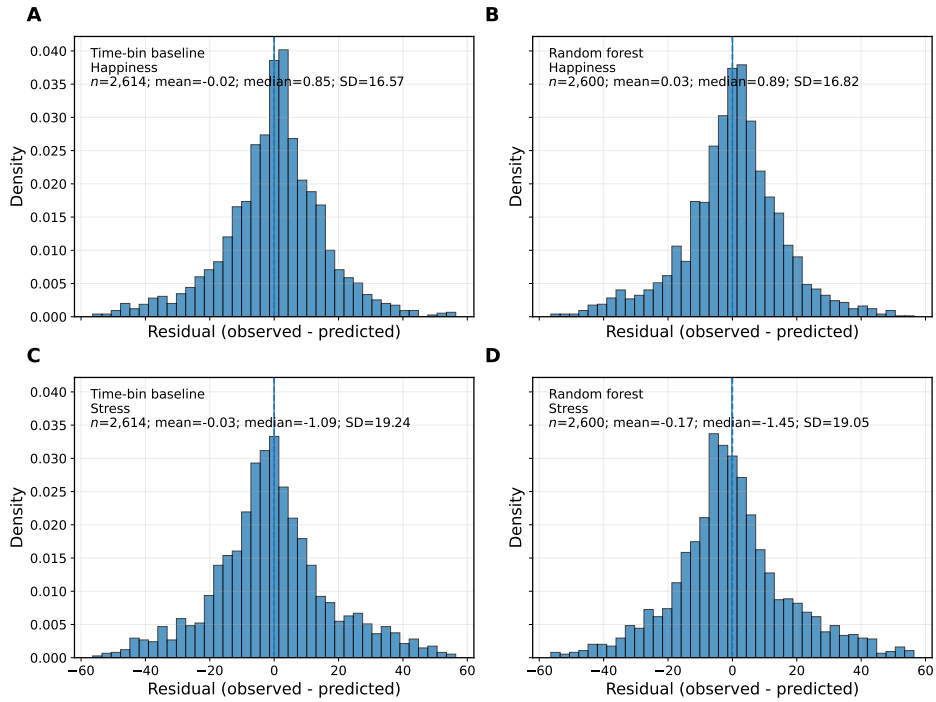

**Fig. 3** Pooled residual distributions for held-out affect predictions. **A**, Residual distribution for time-bin baseline happiness predictions. **B**, Residual distribution for random-forest happiness predictions using pre-context features. **C**, Residual distribution for time-bin baseline stress predictions. **D**, Residual distribution for random-forest stress predictions using pre-context features. Residuals were defined as observed minus predicted affect score. Vertical dashed lines indicate zero residual. Both baseline and random-forest models showed residuals centered near zero but with broad dispersion, indicating limited reduction in momentary prediction error after adding sensor and context features.

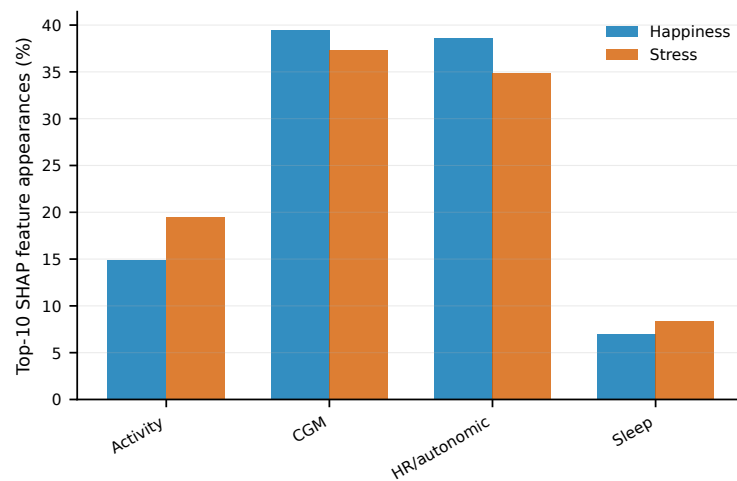

**Fig. 4 Grouped SHAP feature-class frequency across personalized random-forest models.** Top-10 SHAP-ranked features were grouped into four broader classes: CGM, HR/autonomic, activity, and sleep. Bars show the percentage of top-10 SHAP feature appearances assigned to each class for happiness and stress models. The distribution across feature classes indicates that model explanations were not dominated by glucose alone, but reflected multimodal metabolic, autonomic, activity, and sleep-related context.

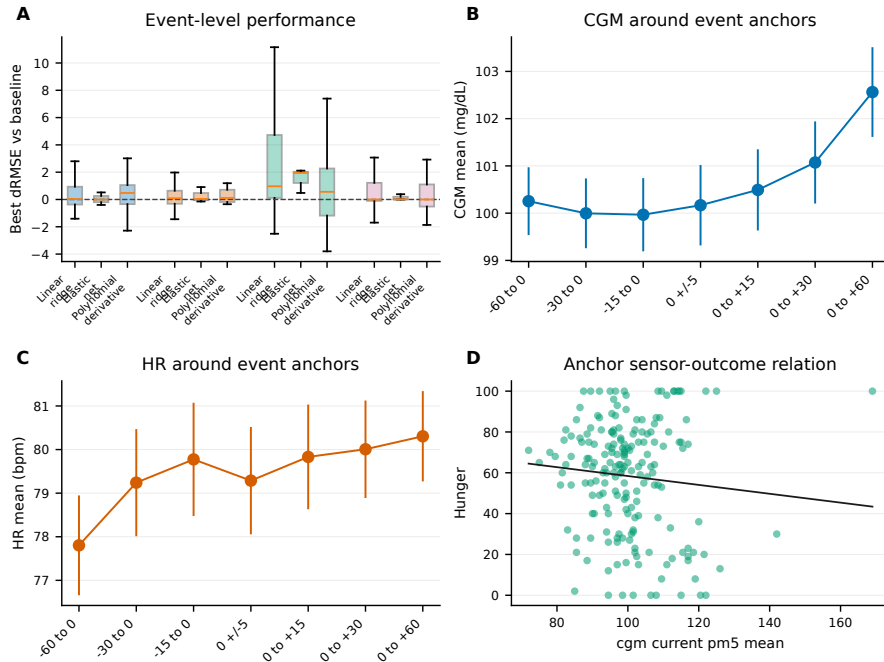

**Fig. 5 Fasting event-context analysis.** **A**, Event-level best-model  $\Delta$ RMSE relative to the time-bin baseline for fasting survey outcomes across linear ridge, elastic-net, and polynomial derivative models. **B**, Mean CGM values across windows before, during, and after fasting event anchors. **C**, Mean HR values across windows before, during, and after fasting event anchors. **D**, Anchor-level relationship between current CGM mean and hunger. These analyses were evaluated using leave-one-anchor-out validation and were interpreted as exploratory event-context analyses rather than day-level prospective prediction.

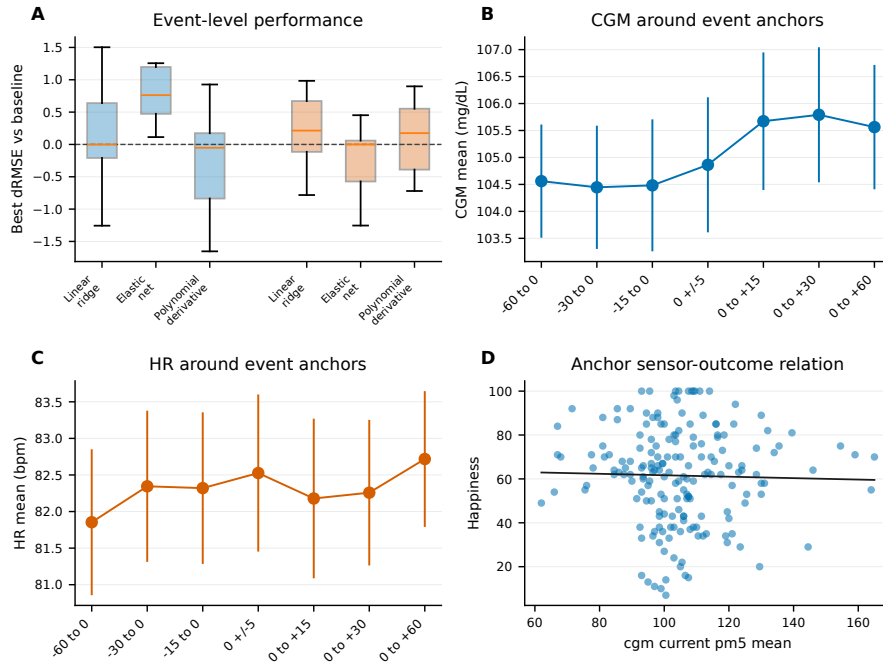

**Fig. 6 Post-meal event-context analysis.** **A**, Event-level best-model  $\Delta$ RMSE relative to the time-bin baseline for post-meal affective outcomes across linear ridge, elastic-net, and polynomial derivative models. **B**, Mean CGM values across windows before, during, and after post-meal event anchors. **C**, Mean HR values across windows before, during, and after post-meal event anchors. **D**, Anchor-level relationship between current CGM mean and happiness. These analyses were exploratory and were used to assess whether metabolically constrained event contexts showed stronger sensor-outcome structure than the primary EMA affect analyses.

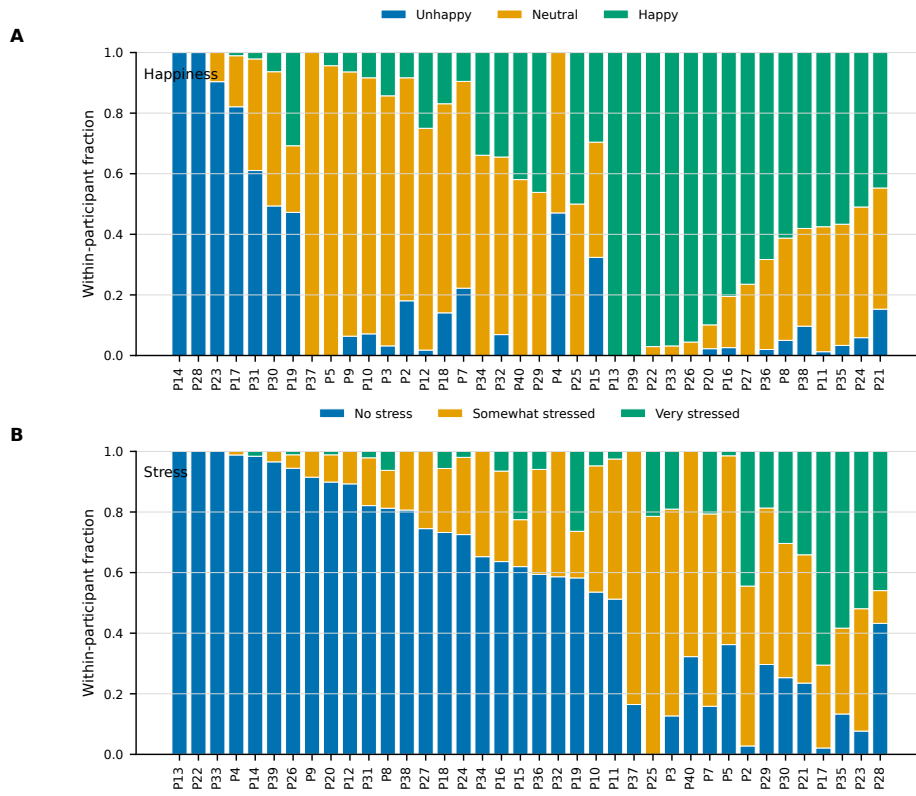

**Fig. 7 Participant-level distribution of three-class ordinal affect states.** Stacked bars show the fraction of each participant’s EMA observations assigned to each three-class ordinal state assigned to each three-class ordinal state for happiness and stress. The figure illustrates substantial heterogeneity in participant-level class balance, including participants dominated by a single affective state and others spanning all three ordinal classes. This heterogeneity motivates within-participant validation and comparison against personalized baselines rather than pooled population-level classification alone.

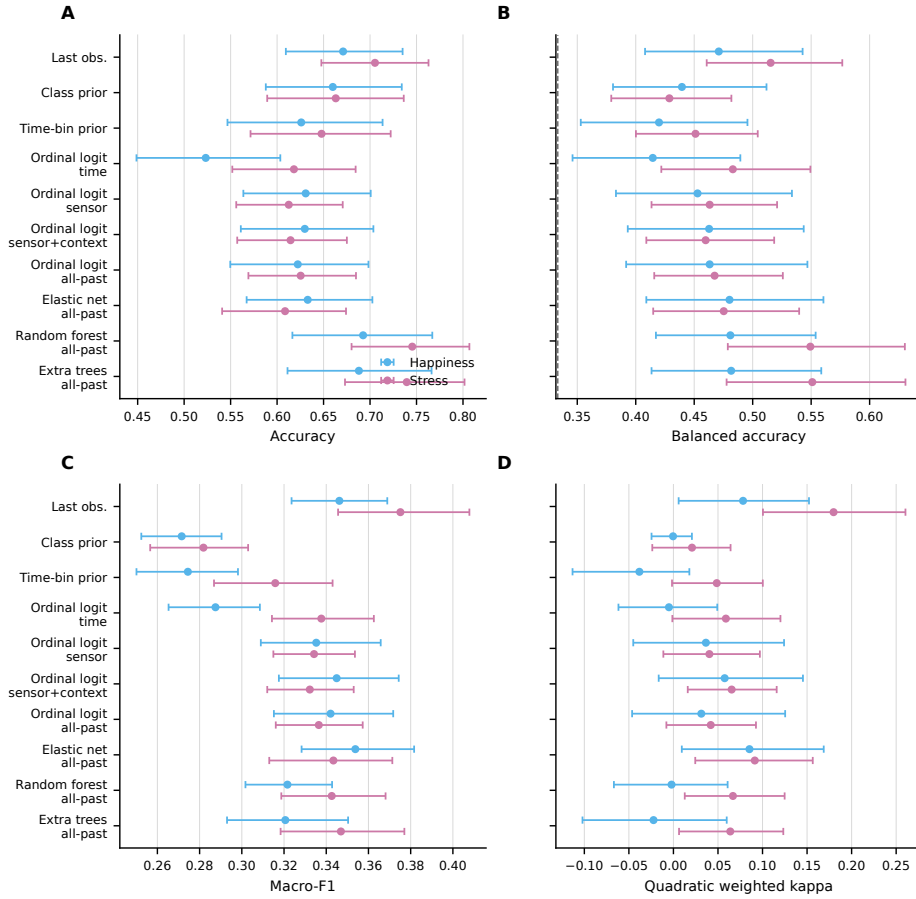

**Fig. 8 Full model-level summary of three-class ordinal classification metrics.** Summary metrics are shown across baseline and model families for happiness and stress. Metrics include accuracy, balanced accuracy, macro-F1, and quadratic weighted kappa. Accuracy and within-one-class performance were generally higher than macro-F1 and kappa because class distributions were imbalanced and many prediction errors occurred between adjacent ordinal states. These summaries show that improvement over personalized baselines depends on the metric used, with stress showing clearer gains in balanced accuracy and ordinal error than happiness.

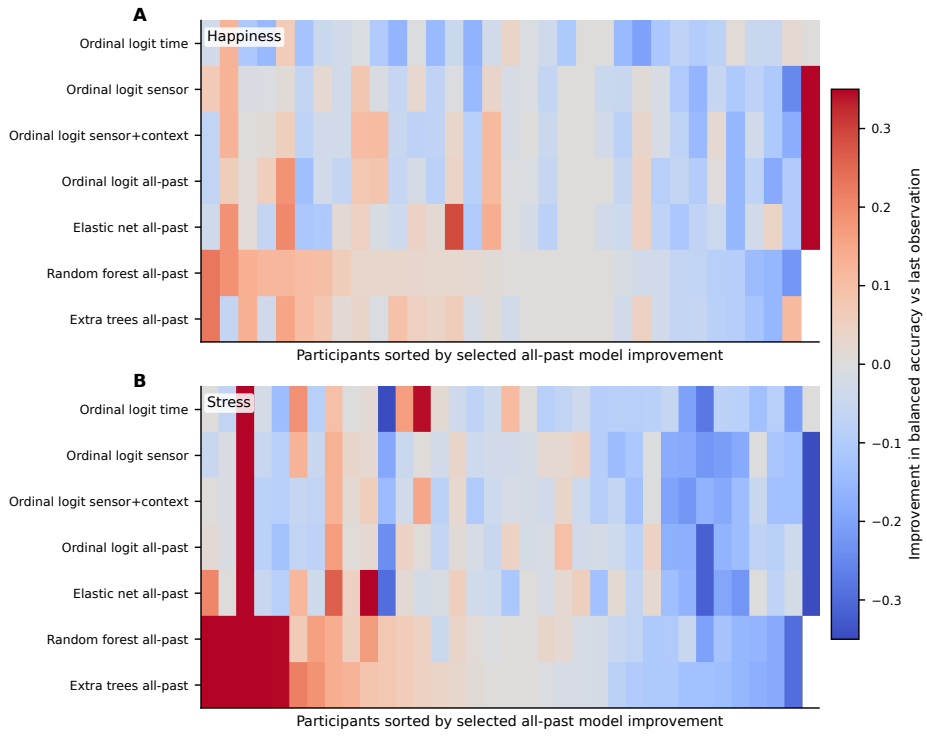

**Fig. 9 Participant-level improvement in balanced accuracy across ordinal model families.** Heatmap values show the change in balanced accuracy for each participant, outcome, and model family relative to the last-observation baseline. Positive values indicate improvement over the participant's most recent prior affective state, whereas negative values indicate worse performance. Improvements were heterogeneous across participants, consistent with individualized temporal and physiological coupling rather than a uniform sensor–affect relationship across the cohort.

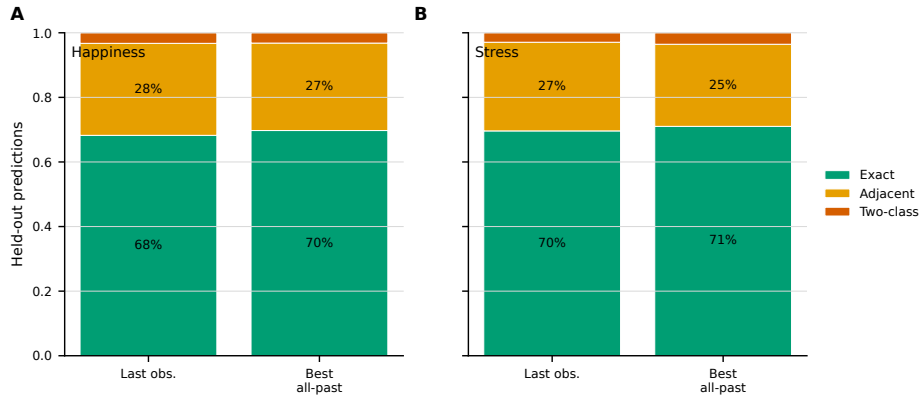

**Fig. 10** Exact, adjacent, and far-error structure in three-class ordinal prediction. Classification errors were decomposed into exact predictions, adjacent one-class errors, and far two-class errors. Because the target is ordinal, adjacent errors represent less severe misclassification than errors between opposite affective states. Across outcomes and models, most incorrect predictions were adjacent-class errors, supporting the interpretation that the classifiers often tracked broad affective state even when exact class assignment was imperfect.

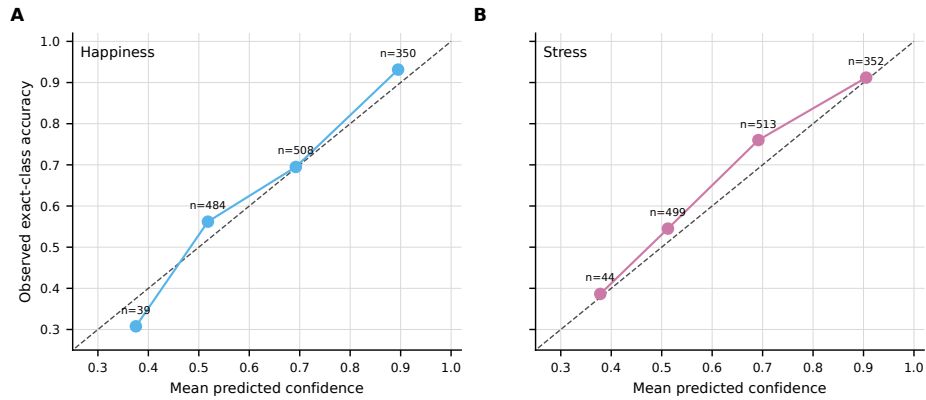

**Fig. 11** Probability-confidence diagnostics for three-class ordinal classifiers. Predicted class probabilities were summarized to assess whether model confidence was associated with correct classification. These diagnostics evaluate whether high-confidence predictions were more often correct and whether probability estimates were concentrated or diffuse across classes. The results provide a calibration-oriented supplement to accuracy-based metrics and help distinguish confident state tracking from uncertain class assignment.

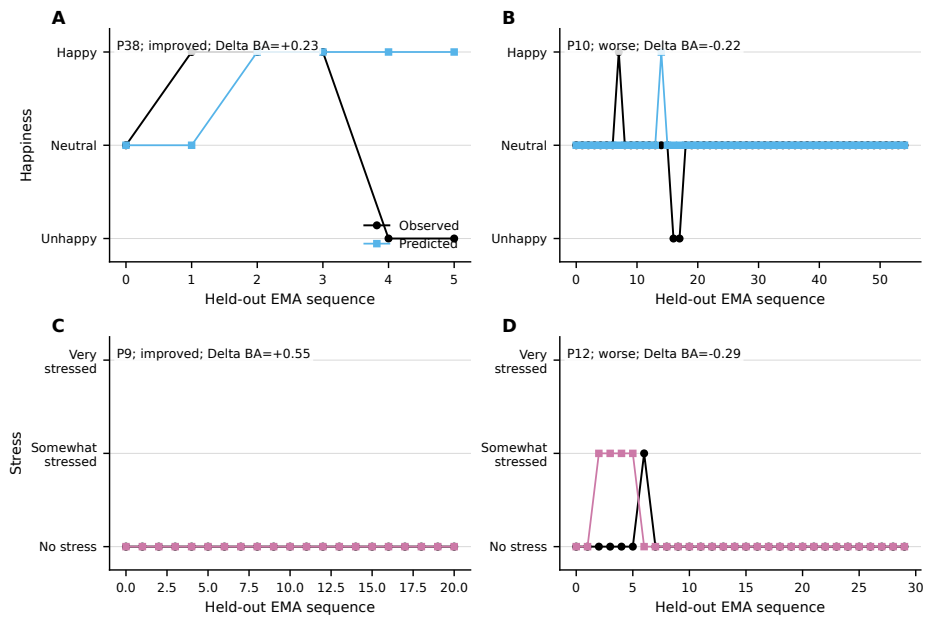

**Fig. 12 Representative participant-level ordinal prediction trajectories.** Example time series compare observed three-class ordinal affect states with predicted classes from the selected all-past model. These participant-level trajectories illustrate the temporal structure underlying aggregate performance metrics, including periods of correct state tracking, adjacent-class underestimation or overestimation, and missed transitions. The examples emphasize that ordinal model performance is participant-dependent and should be interpreted as personalized state tracking rather than as a universal affect classifier.
